# Supplementary material for: Synthesis, Characterization, DFT, and In Silico Investigation of Two Newly Synthesized β-Diketone Derivatives as Potent COX-2 Inhibitors
Source: MDPI journal article supplement (doi:10.3390/bioengineering10121361), 2023-11-27
Supplement: s1 [file s1]

## Supporting Information

# Synthesis, Characterization, DFT, and In Silico Investigation of Two Newly Synthesized $\beta$ -Diketone Derivatives as Potent COX-2 Inhibitors

Malahat Musrat Kurbanova <sup>1,\*</sup>, Abel Mammadali Maharramov <sup>1</sup>, Arzu Zabit Sadigova <sup>1</sup>, Fidan Zaur Gurbanova <sup>2</sup>, Suraj Narayan Mali <sup>3</sup>, Rashad Al-Salahi <sup>4</sup>, Youness El Bakri <sup>5</sup> and Chin-Hung Lai <sup>6,\*</sup>

<sup>1</sup> Organic Chemistry Department, Baku State University, Z. Khalilov 23, Baku 1148, Azerbaijan; amaharramov@bsu.edu.az (A.M.M.); arzu\_sadigova@yahoo.com (A.Z.S.)

<sup>2</sup> Department of Pharmacy and Biotechnology, Bioinformatics, University of Bologna, Via Marsala, 49/A, 40126 Bologna, Italy; fidangurbanova95@outlook.com

<sup>3</sup> Department of Pharmaceutical Sciences and Technology, Birla Institute of Technology, Mesra 835215, India; mali.suraj1695@gmail.com

<sup>4</sup> Department of Pharmaceutical Chemistry, College of Pharmacy, King Saud University, Riyadh 11451, Saudi Arabia; ralsalahi@ksu.edu.sa

<sup>5</sup> Department of Theoretical and Applied Chemistry, South Ural State University, Lenin Prospect 76, Chelyabinsk 454080, Russia; yns.elbakri@gmail.com

<sup>6</sup> Department of Medical Applied Chemistry, Chung Shan Medical University, Taichung 40241, Taiwan

\* Correspondence: mkurbanova72@mail.ru (M.M.K.); chlai125@csmu.edu.tw (C.-H.L.); Tel.: +886-4-24730022-12224 (C.-H.L.)

### Table of Contents:

1. The B3LYP-optimized geometries of **1** and **2**
2. The checkcif file of **1**
3. The checkcif file of **2**
4. The whole amino acid sequences of COX-1 and COX-2 enzymes

The DFT-converged geometry of **1**

|   |             |             |             |
|---|-------------|-------------|-------------|
| F | 6.44003300  | 0.32892500  | 0.17382700  |
| O | -1.02552600 | -2.14395400 | -0.21865500 |
| O | -1.57581800 | 2.55395600  | -0.15949900 |
| N | 0.14037300  | 0.45106400  | -0.15591100 |
| N | 0.99590500  | -0.51967000 | -0.11333300 |
| H | 0.62948800  | -1.48187700 | -0.13550100 |
| C | -1.73879600 | -1.13326900 | -0.27226900 |
| C | -1.16043200 | 0.21263900  | -0.23445900 |
| C | -2.02621900 | 1.43000500  | -0.26151000 |
| C | -3.51977400 | 1.20042300  | -0.45368900 |
| H | -3.69724500 | 1.19022800  | -1.53843400 |
| H | -4.03667100 | 2.07841300  | -0.05937300 |
| C | -4.06540700 | -0.10420100 | 0.16043200  |
| C | -3.24146000 | -1.27770600 | -0.40631600 |
| H | -3.52023600 | -2.23023600 | 0.05216300  |
| H | -3.44583600 | -1.37870400 | -1.48159100 |
| C | 2.38015300  | -0.26825200 | -0.04113000 |
| C | 2.88770100  | 1.03493700  | -0.00614300 |
| H | 2.20416300  | 1.87285900  | -0.03547700 |
| C | 4.26077800  | 1.23317100  | 0.06662000  |
| H | 4.68171300  | 2.23031300  | 0.09534200  |
| C | 5.10253500  | 0.12972900  | 0.10303300  |
| C | 4.61951300  | -1.16881500 | 0.06924000  |
| H | 5.30849000  | -2.00312500 | 0.09940000  |
| C | 3.24459800  | -1.36663400 | -0.00360200 |
| H | 2.84453200  | -2.37421800 | -0.03121400 |
| C | -5.54051900 | -0.28159700 | -0.23439500 |
| H | -5.66059700 | -0.31090200 | -1.32164500 |
| H | -6.14788200 | 0.54371700  | 0.14861900  |
| H | -5.94606400 | -1.21206900 | 0.17463800  |
| C | -3.95536100 | -0.06229800 | 1.69769100  |
| H | -2.92307200 | 0.06075100  | 2.03754600  |
| H | -4.34233300 | -0.98584500 | 2.13812100  |
| H | -4.53580100 | 0.77179900  | 2.10188000  |

The DFT-converged geometry of **2**

|   |             |             |             |
|---|-------------|-------------|-------------|
| F | -2.45513800 | -1.97582700 | -1.13724500 |
| O | 0.94286400  | -1.77123000 | -0.18327800 |
| O | 2.37472000  | 2.73537500  | -0.17013700 |
| N | -0.74373800 | 0.21526700  | -0.08551700 |
| H | -0.57792800 | -0.79969100 | -0.09752500 |
| N | 0.29618900  | 0.99671400  | -0.14424800 |
| C | -2.03205900 | 0.77947200  | -0.00443700 |

|   |             |             |             |
|---|-------------|-------------|-------------|
| C | -3.17583200 | -0.04400600 | 0.04131100  |
| C | -4.44058500 | 0.53965100  | 0.12395300  |
| H | -5.31196100 | -0.10011500 | 0.15848700  |
| C | -4.58634300 | 1.92142600  | 0.16132600  |
| H | -5.57470600 | 2.35940200  | 0.22570600  |
| C | -3.45232900 | 2.73078900  | 0.11523800  |
| H | -3.55187400 | 3.80968600  | 0.14389900  |
| C | -2.18536100 | 2.17033400  | 0.03327400  |
| H | -1.29944200 | 2.78912900  | -0.00194800 |
| C | 1.51898500  | 0.51488900  | -0.22897100 |
| C | 1.83450800  | -0.92319300 | -0.25838100 |
| C | 3.28133700  | -1.34622300 | -0.41025000 |
| H | 3.44966700  | -1.48229800 | -1.48794500 |
| H | 3.38279300  | -2.33426200 | 0.04625400  |
| C | 4.31572500  | -0.34620600 | 0.14451300  |
| C | 4.02332100  | 1.03535600  | -0.47517700 |
| H | 4.70300300  | 1.80064200  | -0.09324600 |
| H | 4.18372400  | 0.98432100  | -1.56149200 |
| C | 2.60408300  | 1.54728300  | -0.27125500 |
| C | -3.06121500 | -1.54479100 | -0.00066900 |
| C | 5.72805400  | -0.80091600 | -0.25754100 |
| H | 5.83309100  | -0.85833100 | -1.34520200 |
| H | 5.95313300  | -1.78898300 | 0.15525700  |
| H | 6.48283800  | -0.10316300 | 0.11679600  |
| C | 4.22490300  | -0.27617200 | 1.68198900  |
| H | 4.43346800  | -1.25369100 | 2.12625100  |
| H | 3.23616600  | 0.04015200  | 2.02685100  |
| H | 4.95416100  | 0.43595900  | 2.07823400  |
| F | -4.25796200 | -2.15788200 | 0.06030100  |
| F | -2.31880100 | -2.02650500 | 1.02980600  |

# checkCIF/PLATON report

You have not supplied any structure factors. As a result the full set of tests cannot be run.

THIS REPORT IS FOR GUIDANCE ONLY. IF USED AS PART OF A REVIEW PROCEDURE FOR PUBLICATION, IT SHOULD NOT REPLACE THE EXPERTISE OF AN EXPERIENCED CRYSTALLOGRAPHIC REFEREE.

No syntax errors found.

[CIF dictionary](#)

[Interpreting this report](#)

## Datablock: A

---

Bond precision: C-C = 0.0031 Å

Wavelength=0.71073

Cell: a=5.993(2) b=10.446(4) c=10.731(4)  
alpha=97.765(8) beta=102.860(8) gamma=98.925(8)  
Temperature: 296 K

|                | Calculated      | Reported        |
|----------------|-----------------|-----------------|
| Volume         | 636.9(4)        | 637.0(4)        |
| Space group    | P -1            | P -1            |
| Hall group     | -P 1            | -P 1            |
| Moiety formula | C14 H15 F N2 O2 | C14 H15 F N2 O2 |
| Sum formula    | C14 H15 F N2 O2 | C14 H15 F N2 O2 |
| Mr             | 262.28          | 262.28          |
| Dx,g cm-3      | 1.368           | 1.368           |
| Z              | 2               | 2               |
| Mu (mm-1)      | 0.102           | 0.102           |
| F000           | 276.0           | 276.0           |
| F000'          | 276.14          |                 |
| h,k,lmax       | 7,12,13         | 7,12,13         |
| Nref           | 2506            | 2454            |
| Tmin,Tmax      | 0.969,0.978     | 0.424,0.747     |
| Tmin'          | 0.967           |                 |

Correction method= # Reported T Limits: Tmin=0.424 Tmax=0.747  
AbsCorr = MULTI-SCAN

Data completeness= 0.979

Theta(max)= 25.997

R(reflections)= 0.0774( 2121)

wR2(reflections)= 0.2627( 2454)

S = 1.041

Npar= 174

---

The following ALERTS were generated. Each ALERT has the format

**test-name\_ALERT\_alert-type\_alert-level.**

Click on the hyperlinks for more details of the test.

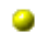

### Alert level C

|                   |                                           |             |
|-------------------|-------------------------------------------|-------------|
| PLAT084 ALERT 3 C | High wR2 Value (i.e. > 0.25) .....        | 0.26 Report |
| PLAT112 ALERT 2 C | ADDSYM Detects New (Pseudo) Symm. Elem. B | 84 %Fit     |

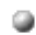

### Alert level G

|                   |                                                  |              |
|-------------------|--------------------------------------------------|--------------|
| PLAT007 ALERT 5 G | Number of Unrefined Donor-H Atoms .....          | 1 Report     |
| PLAT072 ALERT 2 G | SHELXL First Parameter in WGHT Unusually Large   | 0.18 Report  |
| PLAT154 ALERT 1 G | The s.u.'s on the Cell Angles are Equal ..(Note) | 0.008 Degree |
| PLAT933 ALERT 2 G | Number of OMIT records in Embedded RES .....     | 9 Note       |

- 0 **ALERT level A** = Most likely a serious problem - resolve or explain  
 0 **ALERT level B** = A potentially serious problem, consider carefully  
 2 **ALERT level C** = Check. Ensure it is not caused by an omission or oversight  
 4 **ALERT level G** = General information/check it is not something unexpected

- 1 ALERT type 1 CIF construction/syntax error, inconsistent or missing data  
 3 ALERT type 2 Indicator that the structure model may be wrong or deficient  
 1 ALERT type 3 Indicator that the structure quality may be low  
 0 ALERT type 4 Improvement, methodology, query or suggestion  
 1 ALERT type 5 Informative message, check

## Publication of your CIF

A full structural check has been run on your CIF. This includes checks on:

- CIF syntax and construction
- Cell and geometry details
- Space-group symmetry
- Anisotropic displacement parameters

Structure-factor checking is currently being tested on articles submitted to *Acta Crystallographica Section C* and *Acta Crystallographica Section E*. These tests may be carried out with a local version of PLATON or the trial service [here](#)

These full checks give an indication of potential problems with your CIF. Please note that if you intend to submit your CIF for publication in *Acta Crystallographica Section C* or *E* or *IUCrData*, you must make sure that [full publication checks](#) are run on the final version of the CIF prior to submission.

If you intend to submit to another section of *Acta Crystallographica*, *Journal of Applied Crystallography* or *Journal of Synchrotron Radiation*, you should make sure that at least [basic structural checks](#) are run on the final version of your CIF prior to submission.

To submit your CIF for publication in an IUCr journal click [here](#)

**PLATON version of 11/08/2016; check.def file version of 04/08/2016**

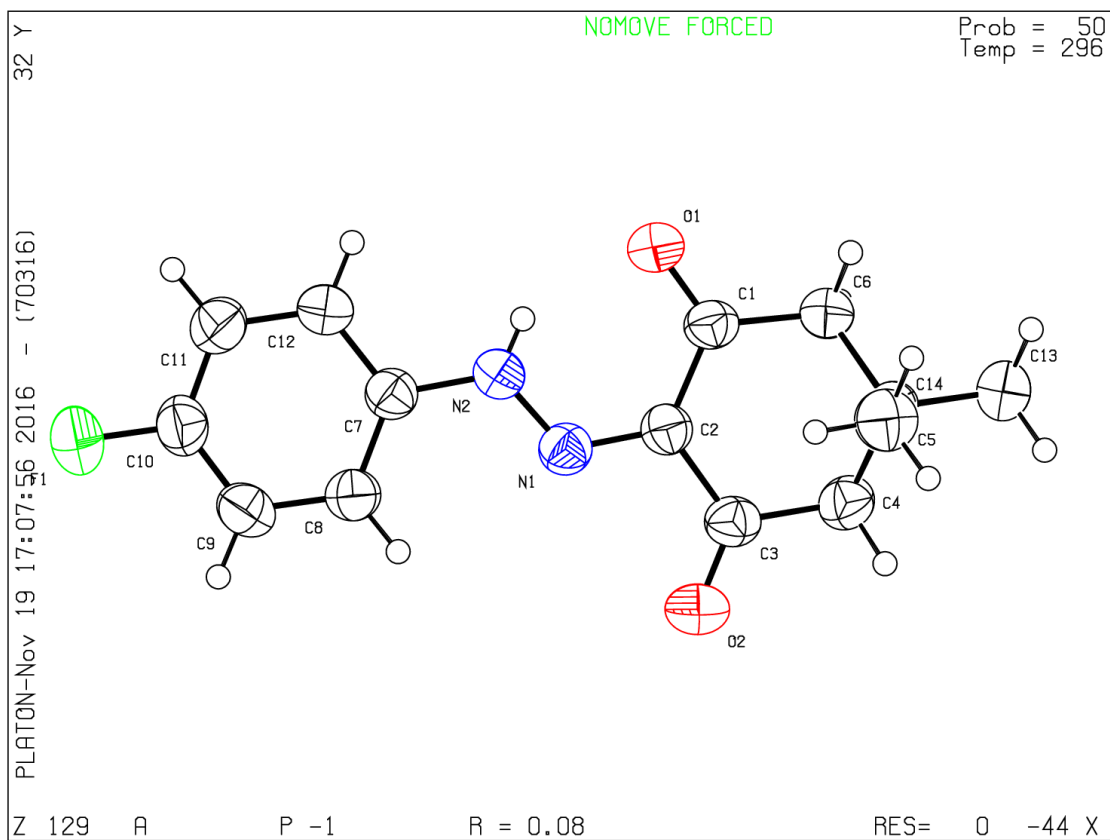

# checkCIF/PLATON report

You have not supplied any structure factors. As a result the full set of tests cannot be run.

THIS REPORT IS FOR GUIDANCE ONLY. IF USED AS PART OF A REVIEW PROCEDURE FOR PUBLICATION, IT SHOULD NOT REPLACE THE EXPERTISE OF AN EXPERIENCED CRYSTALLOGRAPHIC REFEREE.

No syntax errors found.

[CIF dictionary](#)

[Interpreting this report](#)

## Datablock: ma2

---

Bond precision: C-C = 0.0020 Å

Wavelength=0.71073

Cell: a=15.5610(12) b=6.1069(5) c=15.6267(12)  
alpha=90 beta=97.3588(13) gamma=90  
Temperature: 564 K

|                | Calculated       | Reported         |
|----------------|------------------|------------------|
| Volume         | 1472.8(2)        | 1472.8(2)        |
| Space group    | P 21/n           | P 21/n           |
| Hall group     | -P 2yn           | -P 2yn           |
| Moiety formula | C15 H15 F3 N2 O2 | C15 H15 F3 N2 O2 |
| Sum formula    | C15 H15 F3 N2 O2 | C15 H15 F3 N2 O2 |
| Mr             | 312.29           | 312.29           |
| Dx,g cm-3      | 1.408            | 1.408            |
| Z              | 4                | 4                |
| Mu (mm-1)      | 0.120            | 0.120            |
| F000           | 648.0            | 648.0            |
| F000'          | 648.43           |                  |
| h,k,lmax       | 20,8,20          | 20,8,20          |
| Nref           | 3543             | 3528             |
| Tmin,Tmax      | 0.969,0.982      | 0.635,0.746      |
| Tmin'          | 0.927            |                  |

Correction method= # Reported T Limits: Tmin=0.635 Tmax=0.746  
AbsCorr = MULTI-SCAN

Data completeness= 0.996

Theta(max)= 28.000

R(reflections)= 0.0442( 2051)

wR2(reflections)= 0.1083( 3528)

S = 1.085

Npar= 233

---

The following ALERTS were generated. Each ALERT has the format

**test-name\_ALERT\_alert-type\_alert-level.**

Click on the hyperlinks for more details of the test.

---

### ● Alert level C

|                   |                                                                                                                                                                                                    |          |
|-------------------|----------------------------------------------------------------------------------------------------------------------------------------------------------------------------------------------------|----------|
| ABSTY02 ALERT 1 C | An _exptl_absorpt_correction_type has been given without a literature citation. This should be contained in the _exptl_absorpt_process_details field.<br>Absorption correction given as multi-scan |          |
| PLAT230 ALERT 2 C | Hirshfeld Test Diff for C2 -- C13 ..                                                                                                                                                               | 6.3 s.u. |
| PLAT230 ALERT 2 C | Hirshfeld Test Diff for C10 -- C15 ..                                                                                                                                                              | 6.1 s.u. |
| PLAT242 ALERT 2 C | Low 'MainMol' Ueq as Compared to Neighbors of C10                                                                                                                                                  | Check    |

---

### ● Alert level G

|                   |                                                   |          |
|-------------------|---------------------------------------------------|----------|
| PLAT002 ALERT 2 G | Number of Distance or Angle Restraints on AtSite  | 7 Note   |
| PLAT003 ALERT 2 G | Number of Uiso or Uij Restrained non-H Atoms ...  | 6 Report |
| PLAT063 ALERT 4 G | Crystal Size Likely too Large for Beam Size ....  | 0.63 mm  |
| PLAT172 ALERT 4 G | The CIF-Embedded .res File Contains DFIX Records  | 1 Report |
| PLAT186 ALERT 4 G | The CIF-Embedded .res File Contains ISOR Records  | 1 Report |
| PLAT242 ALERT 2 G | Low 'MainMol' Ueq as Compared to Neighbors of C13 | Check    |
| PLAT301 ALERT 3 G | Main Residue Disorder ..... Percentage =          | 14 Note  |
| PLAT860 ALERT 3 G | Number of Least-Squares Restraints .....          | 42 Note  |

---

- 0 **ALERT level A** = Most likely a serious problem - resolve or explain  
0 **ALERT level B** = A potentially serious problem, consider carefully  
4 **ALERT level C** = Check. Ensure it is not caused by an omission or oversight  
8 **ALERT level G** = General information/check it is not something unexpected
- 1 ALERT type 1 CIF construction/syntax error, inconsistent or missing data  
6 ALERT type 2 Indicator that the structure model may be wrong or deficient  
2 ALERT type 3 Indicator that the structure quality may be low  
3 ALERT type 4 Improvement, methodology, query or suggestion  
0 ALERT type 5 Informative message, check
- 

## Publication of your CIF

A full structural check has been run on your CIF. This includes checks on:

- CIF syntax and construction
- Cell and geometry details
- Space-group symmetry
- Anisotropic displacement parameters

Structure-factor checking is currently being tested on articles submitted to *Acta Crystallographica Section C* and *Acta Crystallographica Section E*. These tests may be carried out with a local version of PLATON or the trial service [here](#).

These full checks give an indication of potential problems with your CIF. Please note that if you intend to submit your CIF for publication in *Acta Crystallographica Section C* or *E* or *IUCrData*, you must make sure that [full publication checks](#) are run on the final version of the CIF prior to submission.

If you intend to submit to another section of *Acta Crystallographica*, *Journal of Applied Crystallography* or *Journal of Synchrotron Radiation*, you should make sure that at least [basic structural checks](#) are run on the final version of your CIF prior to submission.



PLATON version of 11/08/2016; check.def file version of 04/08/2016

Datablock ma2 - ellipsoid plot

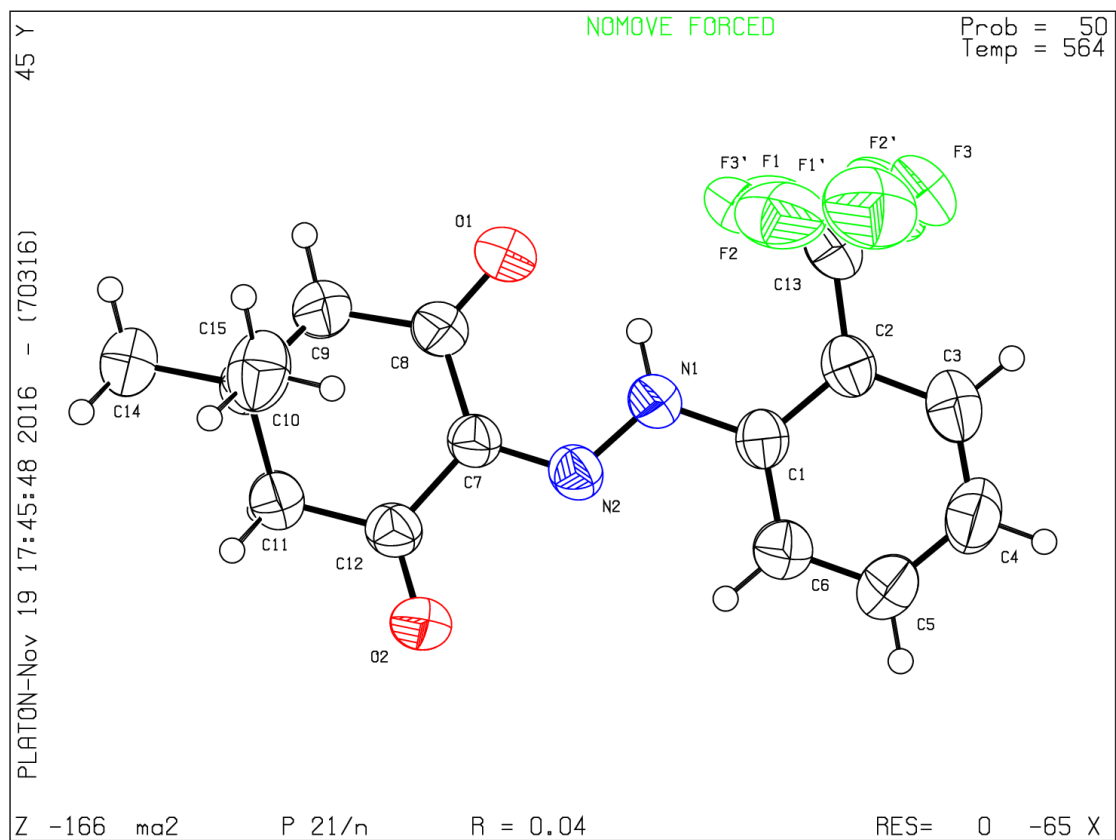

## COX-1

MSRSLLLRFLFLLLLPLPVLLADPGAPTPVNPCCYYPCQHQGICVRFGLDRYQCDCTRTGYSGP  
NCTIPGLWTLRNSLRSPSFTHFLLTHGRWFWFVNATFIREMLMRLVLTVRSNLIPSPPTYNS  
AHDYISWESFSNVSYITRILPSVPKDCPTPMGTKGKKQLPDAQLLARRFLLRRKFIPDPQGTNLM  
FAFFAQHFTHQFFKTSKGKMGPGFTKALGHGVDLGHYGDNLERQYQLRFLKDGKLYQVLDGE  
MYPPSVEEAPVLMHYPRGIPPSQMAVGQEVFGLLPGLMLYATLWLREHNRVCDLLKAEHPT  
WGDEQLFQTTRLILIGETIKIVIEEYVQQLSGYFLQLKFDPELLFGVQFQYRNRIAMEFNHLYHWH  
PLMPDSFKVGSQEYSYEQFLFNTSMLVDYGV EALVDAFSRQIAGRIGGGRNMDHHILHVAVDVI  
RESREMLRQPFNEYRKRFGMKPYTSFQELVGEKEMAAELEELYGDIDALEFYPGLLLEKCHPNSIF  
GESMIEIGAPFSLKGLGNPICSPEYWKPSTFGGEVGFNIVKTATLKKLVCLNTKTCPYVSFRVPDA  
SQDDGPAVERPSTEL

## COX-2

MLARALLCAVLALSHTANPCCSHPCQNRGVCMSVGFDQYKCDCTRTGFYGENCSTPEFLTRIKL  
FLKPTPNTVHYILTHFKGFWNVVNNIPFLRNAIMSYVLTSRSHLIDSPPTYNADYGYKSWEAFSNL  
SYYTRALPPVPDDCPTPLGVKGKKQLPDSNEIVEKLLLRKFIPDPQGSNMMFAFFAQHFTHQFF  
KTDHKRGPAFTNGLGHGVDLNHIYGETLARQRKLRLFKDGKMKYQIIDGEMYPPTVKDTQAEM  
IYPPQVPEHLRFAVGQEVFGLVPGLMMYATIWLREHNRVCDVLKQEHPEWGDEQLFQTSRLILI  
GETIKIVIEDYVQHLSGYHFKLKFDPELLFNKQFQYQNRIAAEFNTLYHWHPLLPDTFQIHDQKYN  
YQQFIYNNSILLEHGITQFVESFTRQIAGRVAGGRNVPPAVQKVSQASIDQSRQMKYQSFNEYRK  
RFMLKPYESFEELTGEKEMSAELEALYGDIDAVELYPALLVEKPRPDAIFGETMVEVGAPFSLKGLM  
GNVICSPAYWKPSTFGGEVGFQIINTASIQSLICNNVKGCPFTSFSVPDPELIKTVTINASSSRGLD  
DINPTVLLKERSTEL
